# Supplementary material for: Genome-Wide Analysis of the TORC1 and Osmotic Stress Signaling Network in Saccharomyces cerevisiae
Source: PubMed Central journal article supplement (PMC4751564; doi:10.1534/g3.115.025882), 2015-12-16
Supplement: supp_g3.115.025882_FigureS1.pdf [file supp_g3.115.025882_FigureS1.pdf]

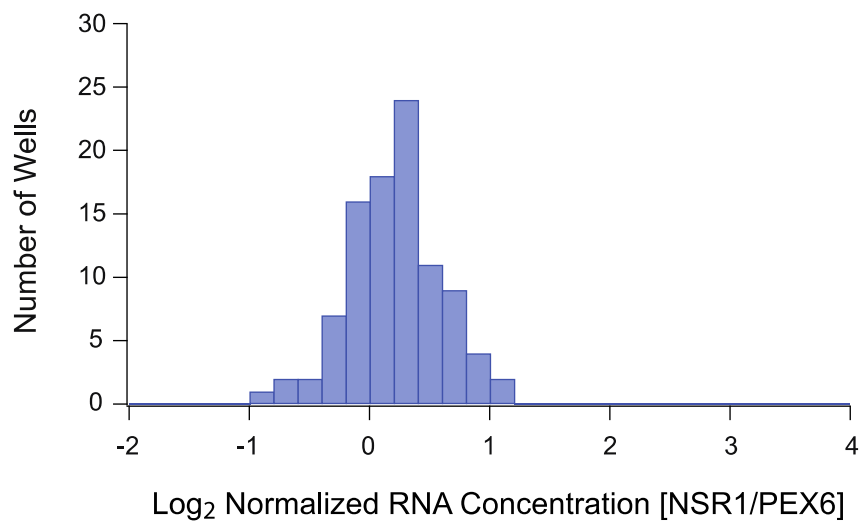

**Figure S1.** NSR1 expression levels during log growth. Histogram showing the distribution of NSR1/PEX6 expression ratios for wild-type cells grown on a single 96-well plate and then treated with mock stress (YEPD medium). The data was normalized (by adding a single constant to all 96 log NSR1/PEX6 ratios) so that the average signal in stress is 0.0. The standard deviation for the 96 measurements of NSR1/PEX6 expression is  $\log_2 = 0.37$ .
